# Supplementary material
Source: MDPI journal article supplement (https://www.mdpi.com/1424-2818/14/5/335)
Supplement: s1 [file s1]

**Figure S1.** Percentage of threatened species imported into China (1996~2015), grouped by taxonomic class. IUCN Red-list status: extinct in the wild (EW), critically endangered (CR), endangered (EN), vulnerable (VU), near threatened (NT), least concern (LC), data deficient (DD), and not evaluated (NE).

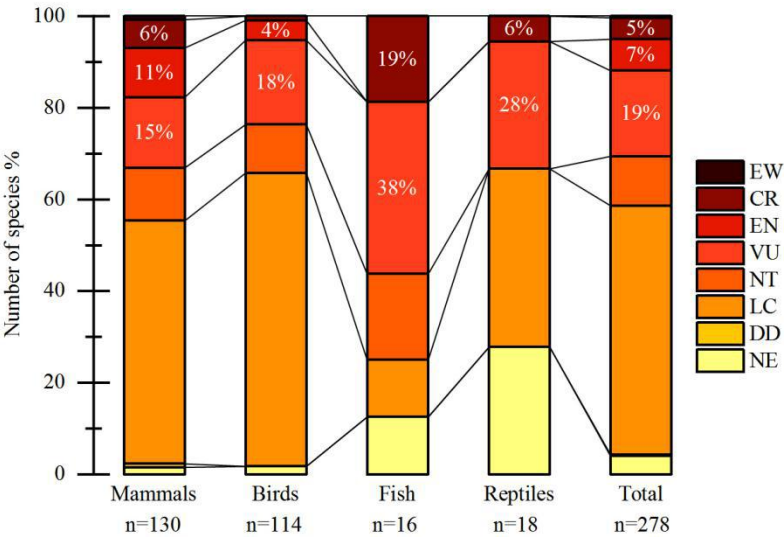

**Figure S2.** Annual variation in the number of threatened species (a) and individuals (b) in China (1996-2015). Note the primary y axis scale in (b).

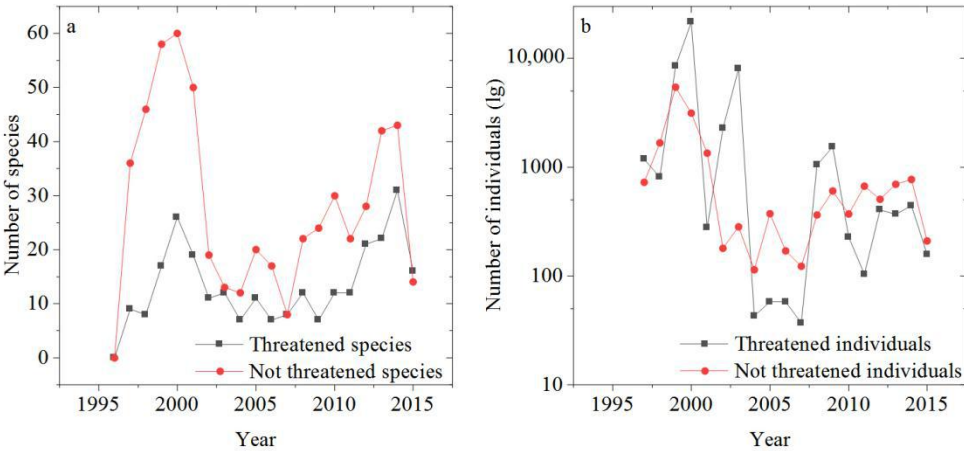

**Table S1.** List of duty-free imported wild animals (1996~2015) in China.

| Class | Scientific name                       | First<br>import<br>year | $t$ | IUCN Red<br>List status | CITES<br>Appendices | Organizations | Imports( $N_0$ ) | Births | Transfers | Deaths | Stock | $N_t$ | $r$    | $\lambda$ |
|-------|---------------------------------------|-------------------------|-----|-------------------------|---------------------|---------------|------------------|--------|-----------|--------|-------|-------|--------|-----------|
| Birds | <i>Acryllium vulturinum</i>           | 2000                    | 18  | LC                      |                     | 2             | 100              | 4      | -2        | 90     | 12    | 14    | -0.109 | 0.897     |
| Birds | <i>Alisterus scapularis</i>           | 2008                    | 10  | LC                      | II                  | 1             | 2                | 0      | 0         | 0      | 2     | 2     | 0      | 1         |
| Birds | <i>Amadina fasciata</i>               | 1998                    | 20  | LC                      |                     | 1             | 70               | 0      | 0         | 70     | 0     | 0     | NA     | 0         |
| Birds | <i>Amandava subflava</i>              | 1998                    | 20  | LC                      |                     | 1             | 70               | 0      | 0         | 70     | 0     | 0     | NA     | 0         |
| Birds | <i>Amazona albifrons</i>              | 1998                    | 20  | LC                      | II                  | 1             | 10               | 0      | 0         | 10     | 0     | 0     | NA     | 0         |
| Birds | <i>Amazona amazonica</i>              | 1999                    | 19  | LC                      | II                  | 3             | 60               | 3      | -18       | 21     | 24    | 42    | -0.019 | 0.981     |
| Birds | <i>Amazona farinosa</i>               | 1999                    | 19  | NT                      | II                  | 2             | 30               | 0      | -5        | 25     | 0     | 5     | -0.094 | 0.91      |
| Birds | <i>Amazona ochrocephala</i>           | 1999                    | 19  | LC                      | II                  | 3             | 38               | 6      | -14       | 19     | 11    | 25    | -0.022 | 0.978     |
| Birds | <i>Amazona pretrei</i>                | 1999                    | 19  | VU                      | I                   | 2             | 14               | 0      | 0         | 14     | 0     | 0     | NA     | 0         |
| Birds | <i>Anastomus oscitans</i>             | 1998                    | 20  | LC                      |                     | 1             | 50               | 0      | 0         | 50     | 0     | 0     | NA     | 0         |
| Birds | <i>Anodorhynchus<br/>hyacinthinus</i> | 1999                    | 19  | VU                      | I                   | 3             | 9                | 0      | 5         | 2      | 12    | 7     | -0.013 | 0.987     |
| Birds | <i>Anthropoides paradiseus</i>        | 2001                    | 17  | VU                      | II                  | 1             | 18               | 1      | 0         | 15     | 4     | 4     | -0.088 | 0.915     |
| Birds | <i>Aprosmictus<br/>erythropterus</i>  | 2010                    | 8   | LC                      | II                  | 1             | 1                | 0      | 0         | 0      | 1     | 1     | 0      | 1         |
| Birds | <i>Aptenodytes patagonicus</i>        | 2006                    | 12  | LC                      |                     | 3             | 19               | 1      | -4        | 6      | 10    | 14    | -0.025 | 0.975     |
| Birds | <i>Ara ararauna</i>                   | 1998                    | 20  | LC                      | II                  | 6             | 234              | 633    | -455      | 83     | 329   | 784   | 0.06   | 1.062     |
| Birds | <i>Ara chloropterus</i>               | 1998                    | 20  | LC                      | II                  | 6             | 312              | 137    | -182      | 74     | 193   | 375   | 0.009  | 1.009     |
| Birds | <i>Ara Macao</i>                      | 1997                    | 21  | LC                      | I                   | 4             | 91               | 39     | -23       | 28     | 79    | 102   | 0.005  | 1.005     |
| Birds | <i>Aratinga auricapillus</i>          | 1999                    | 19  | NT                      | II                  | 1             | 10               | 10     | 0         | 0      | 20    | 20    | 0.036  | 1.037     |
| Birds | <i>Aratinga solstitialis</i>          | 1999                    | 19  | EN                      | II                  | 2             | 60               | 0      | 0         | 28     | 32    | 32    | -0.033 | 0.967     |
| Birds | <i>Argusianus argus</i>               | 2007                    | 11  | NT                      | II                  | 1             | 2                | 0      | 0         | 2      | 0     | 0     | NA     | 0         |
| Birds | <i>Balearica pavonina</i>             | 2001                    | 17  | VU                      | I                   | 2             | 12               | 0      | 0         | 0      | 12    | 12    | 0      | 1         |

|       |                                   |      |    |    |    |   |     |      |      |     |      |      |        |       |
|-------|-----------------------------------|------|----|----|----|---|-----|------|------|-----|------|------|--------|-------|
| Birds | <i>Balearica regulorum</i>        | 1999 | 19 | EN | II | 8 | 219 | 48   | 20   | 119 | 168  | 148  | -0.021 | 0.98  |
| Birds | <i>Barnardius zonarius</i>        | 2010 | 8  | LC | II | 1 | 2   | 0    | 0    | 0   | 2    | 2    | 0      | 1     |
| Birds | <i>Bubo scandiaca</i>             | 2000 | 18 | VU | I  | 1 | 8   | 0    | 0    | 8   | 0    | 0    | NA     | 0     |
| Birds | <i>Bucorvus abyssinicus</i>       | 2014 | 4  | VU |    | 1 | 10  | 0    | 0    | 8   | 2    | 2    | -0.402 | 0.669 |
| Birds | <i>Bucorvus cafer</i>             | 1997 | 21 | VU |    | 2 | 55  | 0    | 0    | 15  | 40   | 40   | -0.015 | 0.985 |
| Birds | <i>Bugeranus carunculatus</i>     | 2000 | 18 | VU | II | 3 | 16  | 3    | 0    | 11  | 8    | 8    | -0.039 | 0.962 |
| Birds | <i>Cacatua alba</i>               | 2000 | 18 | VU | II | 1 | 20  | 1    | 0    | 7   | 14   | 14   | -0.02  | 0.98  |
| Birds | <i>Cacatua galerita</i>           | 1999 | 19 | LC | II | 1 | 6   | 0    | 0    | 6   | 0    | 0    | NA     | 0     |
| Birds | <i>Cacatua goffiniana</i>         | 1999 | 19 | NT | I  | 1 | 4   | 0    | 0    | 4   | 0    | 0    | NA     | 0     |
| Birds | <i>Cacatua leadbeateri</i>        | 2008 | 10 | LC | II | 1 | 4   | 0    | 0    | 3   | 1    | 1    | -0.139 | 0.871 |
| Birds | <i>Cacatua moluccensis</i>        | 1997 | 21 | VU | I  | 2 | 11  | 0    | 0    | 10  | 1    | 1    | -0.114 | 0.892 |
| Birds | <i>Callipepla californica</i>     | 2002 | 16 | LC |    | 1 | 6   | 5    | 0    | 0   | 11   | 11   | 0.038  | 1.039 |
| Birds | <i>Calyptorhynchus banksii</i>    | 2008 | 10 | LC | II | 1 | 6   | 0    | 0    | 0   | 6    | 6    | 0      | 1     |
| Birds | <i>Casuarius casuarius</i>        | 2014 | 4  | LC |    | 1 | 9   | 0    | 0    | 2   | 7    | 7    | -0.063 | 0.939 |
| Birds | <i>Casuarius unappendiculatus</i> | 1999 | 19 | LC |    | 1 | 20  | 0    | 0    | 20  | 0    | 0    | NA     | 0     |
| Birds | <i>Ceratogymna brevis</i>         | 1999 | 19 | LC |    | 1 | 24  | 0    | 0    | 24  | 0    | 0    | NA     | 0     |
| Birds | <i>Chalcopsitta duivenbodei</i>   | 1999 | 19 | LC | II | 1 | 4   | 3    | 0    | 7   | 0    | 0    | NA     | 0     |
| Birds | <i>Chrysolophus amherstiae</i>    | 1997 | 21 | LC |    | 1 | 6   | 5    | 8    | 6   | 13   | 5    | -0.009 | 0.991 |
| Birds | <i>Coracias caudata</i>           | 1998 | 20 | LC |    | 1 | 6   | 0    | 0    | 6   | 0    | 0    | NA     | 0     |
| Birds | <i>Crax alector</i>               | 2013 | 5  | VU |    | 1 | 16  | 3    | 0    | 6   | 13   | 13   | -0.042 | 0.959 |
| Birds | <i>Crossoptilon crossoptilon</i>  | 1997 | 21 | NT | I  | 1 | 6   | 0    | 0    | 6   | 0    | 0    | NA     | 0     |
| Birds | <i>Cygnus atratus</i>             | 1997 | 21 | LC |    | 4 | 250 | 2594 | -302 | 122 | 2420 | 2722 | 0.114  | 1.12  |
| Birds | <i>Cygnus melancoryphus</i>       | 1998 | 20 | LC | II | 6 | 183 | 367  | -54  | 99  | 397  | 451  | 0.045  | 1.046 |

|       |                                      |      |    |    |    |   |     |     |      |     |     |     |        |       |
|-------|--------------------------------------|------|----|----|----|---|-----|-----|------|-----|-----|-----|--------|-------|
| Birds | <i>Cygnus olor</i>                   | 2000 | 18 | LC |    | 7 | 420 | 640 | -436 | 382 | 242 | 678 | 0.027  | 1.027 |
| Birds | <i>Derophtus accipitrinus</i>        | 2012 | 6  | LC | II | 1 | 20  | 0   | 0    | 8   | 12  | 12  | -0.085 | 0.918 |
| Birds | <i>Diopsittaca nobilis</i>           | 1999 | 19 | LC | II | 2 | 46  | 0   | 0    | 29  | 17  | 17  | -0.052 | 0.949 |
| Birds | <i>Eclectus roratus</i>              | 2000 | 18 | LC | II | 2 | 48  | 7   | 0    | 22  | 33  | 33  | -0.021 | 0.979 |
| Birds | <i>Eolophus roseicapillus</i>        | 1999 | 19 | LC | II | 1 | 8   | 0   | 0    | 8   | 0   | 0   | NA     | 0     |
| Birds | <i>Eos bornea</i>                    | 2000 | 18 | LC | II | 2 | 106 | 6   | 0    | 29  | 83  | 83  | -0.014 | 0.987 |
| Birds | <i>Ephippiorhynchus senegalensis</i> | 2000 | 18 | LC |    | 2 | 32  | 0   | 0    | 19  | 13  | 13  | -0.05  | 0.951 |
| Birds | <i>Estrilda quartinia</i>            | 1998 | 20 | LC |    | 1 | 40  | 0   | 0    | 40  | 0   | 0   | NA     | 0     |
| Birds | <i>Eudocimus ruber</i>               | 1998 | 20 | LC | II | 7 | 151 | 297 | 71   | 52  | 467 | 396 | 0.048  | 1.049 |
| Birds | <i>Eudypetes chrysocome</i>          | 2003 | 15 | VU |    | 3 | 29  | 0   | -6   | 4   | 19  | 25  | -0.01  | 0.99  |
| Birds | <i>Euplectes orix</i>                | 1998 | 20 | LC |    | 1 | 160 | 0   | 0    | 160 | 0   | 0   | NA     | 0     |
| Birds | <i>Euplectes progne</i>              | 1998 | 20 | LC |    | 1 | 70  | 0   | 0    | 70  | 0   | 0   | NA     | 0     |
| Birds | <i>Falco cherrug</i>                 | 2002 | 16 | EN | II | 2 | 46  | 0   | 45   | 34  | 57  | 12  | -0.084 | 0.919 |
| Birds | <i>Falco peregrinus</i>              | 2002 | 16 | LC | I  | 1 | 2   | 0   | 0    | 2   | 0   | 0   | NA     | 0     |
| Birds | <i>Falco rusticolus</i>              | 2002 | 16 | LC | I  | 1 | 2   | 0   | 0    | 2   | 0   | 0   | NA     | 0     |
| Birds | <i>Goura cristata</i>                | 2003 | 15 | VU | II | 1 | 4   | 0   | 0    | 4   | 0   | 0   | NA     | 0     |
| Birds | <i>Goura scheepmakeri</i>            | 2007 | 11 | VU | II | 1 | 2   | 0   | 0    | 0   | 2   | 2   | 0      | 1     |
| Birds | <i>Grus antigone</i>                 | 2011 | 7  | VU | II | 3 | 14  | 0   | 0    | 3   | 11  | 11  | -0.034 | 0.966 |
| Birds | <i>Grus canadensis</i>               | 2014 | 4  | LC | II | 1 | 6   | 0   | 0    | 0   | 6   | 6   | 0      | 1     |
| Birds | <i>Lamprotornis chalybaeus</i>       | 1998 | 20 | LC |    | 1 | 500 | 0   | 0    | 500 | 0   | 0   | NA     | 0     |
| Birds | <i>Leptoptilos crumeniferus</i>      | 1997 | 21 | LC |    | 5 | 150 | 104 | -22  | 69  | 163 | 185 | 0.01   | 1.01  |
| Birds | <i>Lophophorus impejanus</i>         | 1997 | 21 | LC | I  | 1 | 4   | 0   | 0    | 4   | 0   | 0   | NA     | 0     |
| Birds | <i>Lophura edwardsi</i>              | 1997 | 21 | CR | I  | 1 | 4   | 0   | 0    | 4   | 0   | 0   | NA     | 0     |
| Birds | <i>Mycteria ibis</i>                 | 1999 | 19 | LC |    | 2 | 65  | 166 | -51  | 70  | 110 | 161 | 0.048  | 1.049 |
| Birds | <i>Nipponia nippon</i>               | 2003 | 15 | EN | II | 3 | 15  | 210 | 20   | 3   | 242 | 222 | 0.18   | 1.197 |

|       |                                 |      |    |    |    |    |      |     |      |     |      |      |        |       |
|-------|---------------------------------|------|----|----|----|----|------|-----|------|-----|------|------|--------|-------|
| Birds | <i>Orthopsittaca manilatus</i>  | 1999 | 19 | LC | II | 1  | 15   | 0   | 0    | 15  | 0    | 0    | NA     | 0     |
| Birds | <i>Pelecanus onocrotalus</i>    | 1998 | 20 | LC |    | 7  | 182  | 495 | -124 | 111 | 442  | 566  | 0.057  | 1.058 |
| Birds | <i>Pelecanus rufescens</i>      | 1998 | 20 | LC |    | 3  | 100  | 49  | 0    | 73  | 76   | 76   | -0.014 | 0.986 |
| Birds | <i>Phoeniconaias minor</i>      | 1998 | 20 | NT | II | 4  | 264  | 3   | 6    | 218 | 55   | 49   | -0.084 | 0.919 |
| Birds | <i>Phoenicopterus chilensis</i> | 2011 | 7  | NT | II | 1  | 40   | 0   | 0    | 0   | 40   | 40   | 0      | 1     |
| Birds | <i>Phoenicopterus roseus</i>    | 1998 | 20 | LC | II | 15 | 1176 | 889 | 8    | 924 | 1149 | 1141 | -0.002 | 0.998 |
| Birds | <i>Phoenicopterus ruber</i>     | 1997 | 21 | LC | II | 19 | 1202 | 229 | -44  | 313 | 1074 | 1118 | -0.003 | 0.997 |
| Birds | <i>Pionus fuscus</i>            | 2012 | 6  | LC | II | 1  | 38   | 2   | 0    | 20  | 20   | 20   | -0.107 | 0.899 |
| Birds | <i>Pionus menstruus</i>         | 2012 | 6  | LC | II | 1  | 40   | 4   | 0    | 13  | 31   | 31   | -0.042 | 0.958 |
| Birds | <i>Pionus senilis</i>           | 1998 | 20 | LC | II | 1  | 10   | 0   | 0    | 10  | 0    | 0    | NA     | 0     |
| Birds | <i>Platalea alba</i>            | 2000 | 18 | LC |    | 1  | 30   | 1   | 0    | 9   | 22   | 22   | -0.017 | 0.983 |
| Birds | <i>Platycercus adscitus</i>     | 1999 | 19 | LC | II | 1  | 4    | 0   | 0    | 4   | 0    | 0    | NA     | 0     |
| Birds | <i>Platycercus elegans</i>      | 2008 | 10 | LC | II | 1  | 4    | 1   | 0    | 3   | 2    | 2    | -0.069 | 0.933 |
| Birds | <i>Platycercus eximius</i>      | 1999 | 19 | LC | II | 1  | 4    | 0   | 0    | 1   | 3    | 3    | -0.015 | 0.985 |
| Birds | <i>Platycercus flaveolus</i>    | 1999 | 19 | NE | II | 1  | 4    | 0   | 0    | 4   | 0    | 0    | NA     | 0     |
| Birds | <i>Plegadis falcinellus</i>     | 2014 | 4  | LC |    | 2  | 18   | 0   | 0    | 10  | 8    | 8    | -0.203 | 0.816 |
| Birds | <i>Ploceus bannermani</i>       | 1998 | 20 | VU |    | 1  | 160  | 0   | 0    | 160 | 0    | 0    | NA     | 0     |
| Birds | <i>Ploceus subpersonatus</i>    | 1998 | 20 | VU |    | 1  | 50   | 0   | 0    | 50  | 0    | 0    | NA     | 0     |
| Birds | <i>Polytelis alexandrae</i>     | 2010 | 8  | NT | II | 1  | 4    | 2   | 0    | 0   | 6    | 6    | 0.051  | 1.052 |
| Birds | <i>Polytelis anthopeplus</i>    | 2010 | 8  | LC | II | 1  | 3    | 0   | 0    | 1   | 2    | 2    | -0.051 | 0.951 |
| Birds | <i>Polytelis swainsonii</i>     | 2008 | 10 | LC | II | 1  | 4    | 0   | 0    | 3   | 1    | 1    | -0.139 | 0.871 |
| Birds | <i>Psittacus erithacus</i>      | 1999 | 19 | EN | I  | 4  | 90   | 0   | 54   | 33  | 111  | 57   | -0.024 | 0.976 |
| Birds | <i>Pteroglossus aracari</i>     | 1999 | 19 | LC | II | 4  | 25   | 0   | 12   | 17  | 20   | 8    | -0.06  | 0.942 |
| Birds | <i>Pteroglossus viridis</i>     | 1999 | 19 | LC | II | 4  | 26   | 0   | 0    | 22  | 4    | 4    | -0.099 | 0.906 |
| Birds | <i>Pygoscelis adeliae</i>       | 2005 | 13 | LC |    | 2  | 14   | 7   | -10  | 0   | 11   | 21   | 0.031  | 1.032 |
| Birds | <i>Pygoscelis antarctica</i>    | 2005 | 13 | LC |    | 3  | 52   | 1   | -12  | 2   | 39   | 51   | -0.001 | 0.999 |
| Birds | <i>Pygoscelis papua</i>         | 2001 | 17 | LC |    | 6  | 150  | 294 | -65  | 16  | 363  | 428  | 0.062  | 1.064 |

|       |                                  |      |    |    |            |    |     |    |    |     |     |     |        |       |
|-------|----------------------------------|------|----|----|------------|----|-----|----|----|-----|-----|-----|--------|-------|
| Birds | <i>Ramphastos sulfuratus</i>     | 1997 | 21 | LC | II         | 5  | 44  | 1  | -8 | 31  | 6   | 14  | -0.055 | 0.947 |
| Birds | <i>Ramphastos swainsonii</i>     | 1997 | 21 | NE |            | 2  | 8   | 0  | 0  | 8   | 0   | 0   | NA     | 0     |
| Birds | <i>Ramphastos toco</i>           | 1999 | 19 | LC | II         | 4  | 65  | 25 | 0  | 49  | 41  | 41  | -0.024 | 0.976 |
| Birds | <i>Ramphastos tucanus</i>        | 1999 | 19 | VU | II         | 5  | 65  | 19 | 8  | 57  | 35  | 27  | -0.046 | 0.955 |
| Birds | <i>Ramphastos vitellinus</i>     | 1999 | 19 | VU | II         | 6  | 78  | 8  | 3  | 57  | 32  | 29  | -0.052 | 0.949 |
| Birds | <i>Rhea americana</i>            | 2000 | 18 | NT | II         | 1  | 25  | 6  | 0  | 18  | 13  | 13  | -0.036 | 0.964 |
| Birds | <i>Spheniscus humboldti</i>      | 1999 | 19 | VU | I          | 10 | 164 | 0  | 12 | 46  | 130 | 118 | -0.017 | 0.983 |
| Birds | <i>Spheniscus magellanicus</i>   | 2005 | 13 | NT |            | 20 | 384 | 2  | 0  | 182 | 204 | 204 | -0.049 | 0.953 |
| Birds | <i>Syrmaticus mikado</i>         | 1997 | 21 | NT | I          | 1  | 3   | 0  | 0  | 3   | 0   | 0   | NA     | 0     |
| Birds | <i>Syrmaticus reevesii</i>       | 1997 | 21 | VU | II         | 1  | 6   | 20 | 66 | 6   | 86  | 20  | 0.057  | 1.059 |
| Birds | <i>Tauraco hartlaubi</i>         | 1998 | 20 | LC | II         | 3  | 37  | 0  | 0  | 37  | 0   | 0   | NA     | 0     |
| Birds | <i>Tauraco persa</i>             | 1998 | 20 | LC | II         | 2  | 20  | 0  | 0  | 20  | 0   | 0   | NA     | 0     |
| Birds | <i>Threskiornis aethiopicus</i>  | 2002 | 16 | LC |            | 1  | 3   | 0  | 0  | 3   | 0   | 0   | NA     | 0     |
| Birds | <i>Tragopan satyra</i>           | 1997 | 21 | NT | III(Nepal) | 1  | 1   | 0  | 0  | 1   | 0   | 0   | NA     | 0     |
| Birds | <i>Trichoglossus haematodus</i>  | 2000 | 18 | LC | II         | 2  | 90  | 9  | 0  | 39  | 60  | 60  | -0.023 | 0.978 |
| Birds | <i>Uraeginthus bengalus</i>      | 1998 | 20 | LC |            | 1  | 50  | 0  | 0  | 50  | 0   | 0   | NA     | 0     |
| Birds | <i>Uraeginthus cyanocephalus</i> | 1998 | 20 | LC |            | 1  | 50  | 0  | 0  | 50  | 0   | 0   | NA     | 0     |
| Birds | <i>Vidua paradisaea</i>          | 1998 | 20 | LC |            | 1  | 120 | 0  | 0  | 120 | 0   | 0   | NA     | 0     |
| Fish  | <i>Aetobatus narinari</i>        | 2014 | 4  | NT |            | 1  | 4   | 0  | 14 | 0   | 18  | 4   | 0      | 1     |
| Fish  | <i>Carcharhinus melanopterus</i> | 2014 | 4  | NT |            | 1  | 2   | 0  | 8  | 0   | 10  | 2   | 0      | 1     |
| Fish  | <i>Carcharhinus plumbeus</i>     | 2014 | 4  | VU |            | 1  | 4   | 0  | 0  | 1   | 3   | 3   | -0.072 | 0.931 |
| Fish  | <i>Carcharias taurus</i>         | 2003 | 15 | VU |            | 6  | 28  | 0  | 2  | 13  | 17  | 15  | -0.042 | 0.959 |
| Fish  | <i>Dasyatis akajei</i>           | 2014 | 4  | NT |            | 1  | 17  | 0  | 0  | 8   | 9   | 9   | -0.159 | 0.853 |
| Fish  | <i>Dasyatis uarnak</i>           | 2014 | 4  | NE |            | 1  | 2   | 0  | 9  | 0   | 11  | 2   | 0      | 1     |

|         |                                 |      |    |    |            |    |     |     |     |     |     |     |        |       |
|---------|---------------------------------|------|----|----|------------|----|-----|-----|-----|-----|-----|-----|--------|-------|
| Fish    | <i>Glaucostegus granulatus</i>  | 2014 | 4  | CR |            | 1  | 2   | 0   | 2   | 0   | 4   | 2   | 0      | 1     |
| Fish    | <i>Gymnothorax melanospilos</i> | 2014 | 4  | NE |            | 1  | 3   | 0   | 11  | 0   | 14  | 3   | 0      | 1     |
| Fish    | <i>Manta birostris</i>          | 2013 | 5  | VU | II         | 1  | 3   | 0   | 0   | 2   | 1   | 1   | -0.22  | 0.803 |
| Fish    | <i>Orectolobus Maculatus</i>    | 2014 | 4  | LC |            | 1  | 2   | 0   | 0   | 1   | 1   | 1   | -0.173 | 0.841 |
| Fish    | <i>Rhina ancylostoma</i>        | 2014 | 4  | CR | II         | 1  | 1   | 0   | 1   | 0   | 2   | 1   | 0      | 1     |
| Fish    | <i>Rhinoptera javanica</i>      | 2014 | 4  | VU |            | 1  | 161 | 0   | 0   | 45  | 116 | 116 | -0.082 | 0.921 |
| Fish    | <i>Rhynchobatus djiddensis</i>  | 2014 | 4  | VU |            | 1  | 8   | 0   | 1   | 0   | 9   | 8   | 0      | 1     |
| Fish    | <i>Sphyrna lewini</i>           | 2013 | 5  | CR | II         | 1  | 27  | 0   | 0   | 0   | 27  | 27  | 0      | 1     |
| Fish    | <i>Sphyrna tiburo</i>           | 2013 | 5  | LC |            | 1  | 9   | 0   | 0   | 6   | 3   | 3   | -0.22  | 0.803 |
| Fish    | <i>Taeniura meyeni</i>          | 2014 | 4  | VU |            | 1  | 5   | 0   | 12  | 0   | 17  | 5   | 0      | 1     |
| Mammals | <i>Acinonyx jubatus</i>         | 1997 | 21 | VU | I          | 17 | 176 | 92  | -7  | 178 | 83  | 90  | -0.032 | 0.969 |
| Mammals | <i>Aepyceros melampus</i>       | 1997 | 21 | LC |            | 5  | 128 | 38  | 0   | 140 | 26  | 26  | -0.076 | 0.927 |
| Mammals | <i>Alcelaphus buselaphus</i>    | 1999 | 19 | LC |            | 1  | 20  | 2   | 0   | 20  | 2   | 2   | -0.121 | 0.886 |
| Mammals | <i>Alouatta seniculus</i>       | 2010 | 8  | LC | II         | 1  | 10  | 0   | 0   | 9   | 1   | 1   | -0.288 | 0.75  |
| Mammals | <i>Antidorcas marsupialis</i>   | 1999 | 19 | LC |            | 7  | 270 | 100 | -5  | 349 | 16  | 21  | -0.134 | 0.874 |
| Mammals | <i>Aonyx cinerea</i>            | 2010 | 8  | VU | I          | 3  | 20  | 9   | 0   | 3   | 26  | 26  | 0.033  | 1.033 |
| Mammals | <i>Aotus vociferans</i>         | 2010 | 8  | LC | II         | 1  | 4   | 3   | 0   | 3   | 4   | 4   | 0      | 1     |
| Mammals | <i>Arctictis binturong</i>      | 2000 | 18 | VU | III(India) | 1  | 4   | 21  | 0   | 0   | 25  | 25  | 0.102  | 1.107 |
| Mammals | <i>Arctocephalus australis</i>  | 2007 | 11 | LC |            | 7  | 77  | 85  | -20 | 21  | 121 | 141 | 0.055  | 1.057 |
| Mammals | <i>Arctocephalus pusillus</i>   | 1998 | 20 | LC |            | 7  | 60  | 21  | -3  | 55  | 23  | 26  | -0.042 | 0.959 |
| Mammals | <i>Ateles fusciceps</i>         | 2005 | 13 | EN | II         | 1  | 1   | 7   | -2  | 3   | 3   | 5   | 0.124  | 1.132 |
| Mammals | <i>Ateles paniscus</i>          | 2001 | 17 | VU | II         | 2  | 20  | 12  | -11 | 4   | 17  | 28  | 0.02   | 1.02  |
| Mammals | <i>Callithrix jacchus</i>       | 2014 | 4  | LC | II         | 1  | 50  | 160 | 0   | 10  | 200 | 200 | 0.347  | 1.414 |
| Mammals | <i>Callorhinus ursinus</i>      | 2014 | 4  | VU |            | 2  | 10  | 2   | 0   | 5   | 7   | 7   | -0.089 | 0.915 |
| Mammals | <i>Canis lupus</i>              | 2003 | 15 | LC | II         | 10 | 50  | 58  | -41 | 7   | 60  | 101 | 0.047  | 1.048 |
| Mammals | <i>Canis mesomelas</i>          | 2006 | 12 | LC |            | 3  | 20  | 20  | -13 | 4   | 23  | 36  | 0.049  | 1.05  |

|         |                                |      |    |    |    |    |     |     |     |     |     |     |        |       |
|---------|--------------------------------|------|----|----|----|----|-----|-----|-----|-----|-----|-----|--------|-------|
| Mammals | <i>Caracal caracal</i>         | 2006 | 12 | LC | II | 1  | 4   | 1   | 0   | 4   | 1   | 1   | -0.116 | 0.891 |
| Mammals | <i>Castor fiber</i>            | 2014 | 4  | LC |    | 1  | 2   | 0   | 0   | 0   | 2   | 2   | 0      | 1     |
| Mammals | <i>Cebus albifrons</i>         | 1999 | 19 | LC | II | 4  | 88  | 11  | -5  | 71  | 23  | 28  | -0.06  | 0.942 |
| Mammals | <i>Cebus brunneus</i>          | 1997 | 21 | LC | II | 1  | 2   | 0   | 0   | 2   | 0   | 0   | NA     | 0     |
| Mammals | <i>Cebus olivaceus</i>         | 2003 | 15 | LC | II | 1  | 20  | 5   | -5  | 0   | 20  | 25  | 0.015  | 1.015 |
| Mammals | <i>Ceratotherium simum</i>     | 1997 | 21 | NT | II | 32 | 205 | 55  | 1   | 30  | 231 | 230 | 0.005  | 1.005 |
| Mammals | <i>Cercopithecus neglectus</i> | 1997 | 21 | LC | II | 4  | 26  | 25  | -4  | 19  | 28  | 32  | 0.01   | 1.01  |
| Mammals | <i>Cercopithecus nictitans</i> | 2004 | 14 | NT | II | 3  | 18  | 3   | 0   | 9   | 12  | 12  | -0.029 | 0.971 |
| Mammals | <i>Cercopithecus lhoesti</i>   | 2012 | 6  | VU | II | 1  | 12  | 0   | 0   | 9   | 3   | 3   | -0.231 | 0.794 |
| Mammals | <i>Chiropotes satanas</i>      | 2001 | 17 | EN | II | 2  | 20  | 6   | -14 | 7   | 5   | 19  | -0.003 | 0.997 |
| Mammals | <i>Chlorocebus sabaeus</i>     | 2010 | 8  | LC | II | 2  | 130 | 141 | 0   | 23  | 248 | 248 | 0.081  | 1.084 |
| Mammals | <i>Choeropsis liberiensis</i>  | 1998 | 20 | EN | II | 1  | 2   | 9   | 1   | 0   | 12  | 11  | 0.085  | 1.089 |
| Mammals | <i>Choloepus didactylus</i>    | 2001 | 17 | LC |    | 3  | 20  | 7   | 6   | 8   | 25  | 19  | -0.003 | 0.997 |
| Mammals | <i>Chrysocyon brachyurus</i>   | 2005 | 13 | NT | II | 1  | 4   | 0   | 0   | 0   | 4   | 4   | 0      | 1     |
| Mammals | <i>Colobus guereza</i>         | 2012 | 6  | LC | II | 2  | 58  | 1   | -20 | 25  | 14  | 34  | -0.089 | 0.915 |
| Mammals | <i>Connochaetes gnou</i>       | 1998 | 20 | LC |    | 3  | 49  | 28  | -10 | 39  | 28  | 38  | -0.013 | 0.987 |
| Mammals | <i>Connochaetes taurinus</i>   | 1998 | 20 | LC |    | 5  | 76  | 157 | -15 | 138 | 80  | 95  | 0.011  | 1.011 |
| Mammals | <i>Crocota crocuta</i>         | 2006 | 12 | LC |    | 1  | 5   | 19  | -11 | 11  | 2   | 13  | 0.08   | 1.083 |
| Mammals | <i>Damaliscus pygargus</i>     | 1997 | 21 | LC |    | 4  | 138 | 123 | -6  | 189 | 66  | 72  | -0.031 | 0.969 |
| Mammals | <i>Delphinapterus leucas</i>   | 2001 | 17 | LC | II | 20 | 171 | 1   | -11 | 24  | 137 | 148 | -0.008 | 0.992 |
| Mammals | <i>Diceros bicornis</i>        | 1999 | 19 | CR | I  | 1  | 5   | 6   | 0   | 0   | 11  | 11  | 0.041  | 1.042 |
| Mammals | <i>Elephas maximus</i>         | 1997 | 21 | EN | I  | 8  | 43  | 12  | -3  | 1   | 51  | 54  | 0.011  | 1.011 |
| Mammals | <i>Enhydra lutris</i>          | 2003 | 15 | EN | II | 1  | 2   | 1   | 0   | 2   | 1   | 1   | -0.046 | 0.955 |
| Mammals | <i>Equus grevyi</i>            | 2001 | 17 | EN | I  | 1  | 1   | 0   | 0   | 1   | 0   | 0   | NA     | 0     |
| Mammals | <i>Equus quagga</i>            | 1997 | 21 | NT |    | 23 | 236 | 285 | -9  | 141 | 371 | 380 | 0.023  | 1.023 |
| Mammals | <i>Erignathus barbatus</i>     | 2013 | 5  | LC |    | 2  | 15  | 0   | 0   | 4   | 11  | 11  | -0.062 | 0.94  |
| Mammals | <i>Erythrocebus patas</i>      | 1997 | 21 | NT | II | 3  | 30  | 50  | 7   | 24  | 63  | 56  | 0.03   | 1.03  |



|         |                                       |      |    |    |               |    |     |     |     |     |     |     |        |       |
|---------|---------------------------------------|------|----|----|---------------|----|-----|-----|-----|-----|-----|-----|--------|-------|
| Mammals | <i>Eudorcas thomsonii</i>             | 2000 | 18 | LC |               | 1  | 12  | 0   | 0   | 12  | 0   | 0   | NA     | 0     |
| Mammals | <i>Eulemur fulvus</i>                 | 2006 | 12 | VU | I             | 1  | 10  | 0   | 0   | 10  | 0   | 0   | NA     | 0     |
| Mammals | <i>Eumetopias jubatus</i>             | 2008 | 10 | NT |               | 3  | 12  | 3   | 11  | 0   | 26  | 15  | 0.022  | 1.023 |
| Mammals | <i>Giraffa camelopardalis</i>         | 1997 | 21 | VU | II            | 43 | 504 | 202 | 21  | 400 | 327 | 306 | -0.024 | 0.977 |
| Mammals | <i>Globicephala<br/>macrorhynchus</i> | 2008 | 10 | LC | II            | 1  | 4   | 0   | 0   | 2   | 2   | 2   | -0.069 | 0.933 |
| Mammals | <i>Gorilla gorilla</i>                | 2010 | 8  | CR | I             | 1  | 2   | 0   | -2  | 0   | 0   | 2   | 0      | 1     |
| Mammals | <i>Grampus griseus</i>                | 2008 | 10 | LC | II            | 4  | 21  | 4   | 0   | 20  | 5   | 5   | -0.144 | 0.866 |
| Mammals | <i>Halichoerus grypus</i>             | 2005 | 13 | LC |               | 2  | 11  | 0   | 0   | 1   | 10  | 10  | -0.007 | 0.993 |
| Mammals | <i>Hippopotamus<br/>amphibius</i>     | 1997 | 21 | VU | II            | 6  | 10  | 20  | -14 | 0   | 16  | 30  | 0.052  | 1.054 |
| Mammals | <i>Histiophoca fasciata</i>           | 2009 | 9  | LC |               | 1  | 6   | 0   | 0   | 3   | 3   | 3   | -0.077 | 0.926 |
| Mammals | <i>Hyaena hyaena</i>                  | 2000 | 18 | NT | III(Pakistan) | 2  | 7   | 2   | 0   | 4   | 5   | 5   | -0.019 | 0.981 |
| Mammals | <i>Hydrochoerus<br/>hydrochaeris</i>  | 2009 | 9  | LC |               | 2  | 14  | 6   | 0   | 14  | 6   | 6   | -0.094 | 0.91  |
| Mammals | <i>Kobus ellipsiprymnus</i>           | 1998 | 20 | LC |               | 1  | 7   | 27  | 0   | 7   | 27  | 27  | 0.067  | 1.07  |
| Mammals | <i>Kobus leche</i>                    | 1999 | 19 | NT | II            | 1  | 13  | 14  | 0   | 13  | 14  | 14  | 0.004  | 1.004 |
| Mammals | <i>Lagenorhynchus<br/>obliquidens</i> | 2011 | 7  | LC | II            | 4  | 16  | 0   | -2  | 1   | 13  | 15  | -0.009 | 0.991 |
| Mammals | <i>Lama glama</i>                     | 2001 | 17 | NE |               | 5  | 45  | 174 | -37 | 52  | 130 | 167 | 0.077  | 1.08  |
| Mammals | <i>Lama guanicoe</i>                  | 2015 | 3  | LC | II            | 1  | 1   | 0   | 0   | 0   | 1   | 1   | 0      | 1     |
| Mammals | <i>Lemur catta</i>                    | 2000 | 18 | EN | I             | 17 | 379 | 569 | -8  | 176 | 764 | 772 | 0.04   | 1.04  |
| Mammals | <i>Leontopithecus rosalia</i>         | 2014 | 4  | EN | I             | 2  | 6   | 11  | 4   | 1   | 20  | 16  | 0.245  | 1.278 |
| Mammals | <i>Leptailurus serval</i>             | 1999 | 19 | LC | II            | 1  | 10  | 0   | 0   | 4   | 6   | 6   | -0.027 | 0.973 |
| Mammals | <i>Lontra canadensis</i>              | 2007 | 11 | LC |               | 2  | 13  | 0   | 0   | 9   | 4   | 4   | -0.107 | 0.898 |
| Mammals | <i>Loxodonta africana</i>             | 1997 | 21 | VU | II            | 8  | 50  | 0   | -10 | 5   | 35  | 45  | -0.005 | 0.995 |
| Mammals | <i>Lutra lutra</i>                    | 2002 | 16 | NT | I             | 1  | 6   | 10  | 6   | 4   | 18  | 12  | 0.043  | 1.044 |

|         |                                |      |    |    |               |    |     |     |      |     |     |      |        |       |
|---------|--------------------------------|------|----|----|---------------|----|-----|-----|------|-----|-----|------|--------|-------|
| Mammals | <i>Lycaon pictus</i>           | 2000 | 18 | EN |               | 3  | 36  | 18  | 0    | 27  | 27  | 27   | -0.016 | 0.984 |
| Mammals | <i>Macaca fuscata</i>          | 2000 | 18 | LC | II            | 1  | 25  | 6   | 0    | 28  | 3   | 3    | -0.118 | 0.889 |
| Mammals | <i>Macaca nigra</i>            | 2005 | 13 | CR | II            | 2  | 8   | 2   | 0    | 1   | 9   | 9    | 0.009  | 1.009 |
| Mammals | <i>Macaca silenus</i>          | 1997 | 21 | EN | I             | 3  | 24  | 12  | 0    | 11  | 25  | 25   | 0.002  | 1.002 |
| Mammals | <i>Macropus eugenii</i>        | 1999 | 19 | LC |               | 6  | 78  | 37  | -5   | 91  | 19  | 24   | -0.062 | 0.94  |
| Mammals | <i>Macropus giganteus</i>      | 1998 | 20 | LC |               | 13 | 84  | 33  | -6   | 39  | 72  | 78   | -0.004 | 0.996 |
| Mammals | <i>Macropus rufogriseus</i>    | 1997 | 21 | LC |               | 14 | 210 | 23  | -12  | 188 | 33  | 45   | -0.073 | 0.929 |
| Mammals | <i>Macropus rufus</i>          | 1997 | 21 | LC |               | 18 | 175 | 213 | 15   | 175 | 228 | 213  | 0.009  | 1.009 |
| Mammals | <i>Mandrillus sphinx</i>       | 1997 | 21 | VU | I             | 18 | 76  | 57  | -9   | 43  | 81  | 90   | 0.008  | 1.008 |
| Mammals | <i>Mungos mungo</i>            | 2000 | 18 | LC |               | 1  | 20  | 48  | -25  | 5   | 38  | 63   | 0.064  | 1.066 |
| Mammals | <i>Myrmecophaga tridactyla</i> | 2000 | 18 | VU | II            | 6  | 24  | 14  | -2   | 7   | 29  | 31   | 0.014  | 1.014 |
| Mammals | <i>Naemorhedus goral</i>       | 1999 | 19 | NT | I             | 1  | 30  | 10  | 0    | 30  | 10  | 10   | -0.058 | 0.944 |
| Mammals | <i>Nasua nasua</i>             | 2007 | 11 | LC | III(Honduras) | 1  | 10  | 14  | -14  | 7   | 3   | 17   | 0.048  | 1.049 |
| Mammals | <i>Odobenus rosmarus</i>       | 2000 | 18 | VU | III(Canada)   | 12 | 70  | 0   | -6   | 11  | 53  | 59   | -0.009 | 0.991 |
| Mammals | <i>Orcinus orca</i>            | 2013 | 5  | DD | II            | 1  | 9   | 0   | 0    | 0   | 9   | 9    | 0      | 1     |
| Mammals | <i>Oryx dammah</i>             | 1999 | 19 | EW | I             | 1  | 6   | 16  | 0    | 5   | 17  | 17   | 0.055  | 1.056 |
| Mammals | <i>Oryx gazella</i>            | 1997 | 21 | LC |               | 7  | 158 | 142 | -9   | 191 | 100 | 109  | -0.018 | 0.982 |
| Mammals | <i>Otaria flavescens</i>       | 1997 | 21 | LC |               | 19 | 182 | 90  | -9   | 69  | 194 | 203  | 0.005  | 1.005 |
| Mammals | <i>Ovis gmelini musimon</i>    | 2000 | 18 | NT |               | 1  | 12  | 0   | 0    | 12  | 0   | 0    | NA     | 0     |
| Mammals | <i>Pan troglodytes</i>         | 1998 | 20 | EN | I             | 25 | 123 | 25  | 10   | 49  | 109 | 99   | -0.011 | 0.989 |
| Mammals | <i>Panthera leo</i>            | 1997 | 21 | VU | II            | 22 | 235 | 240 | -114 | 128 | 233 | 347  | 0.019  | 1.019 |
| Mammals | <i>Panthera onca</i>           | 1999 | 19 | NT | I             | 4  | 10  | 34  | 1    | 21  | 24  | 23   | 0.044  | 1.045 |
| Mammals | <i>Panthera tigris</i>         | 1997 | 21 | EN | I             | 18 | 277 | 845 | -99  | 121 | 902 | 1001 | 0.061  | 1.063 |
| Mammals | <i>Panthera uncia</i>          | 2001 | 17 | VU | I             | 1  | 2   | 0   | 0    | 1   | 1   | 1    | -0.041 | 0.96  |
| Mammals | <i>Papio anubis</i>            | 2002 | 16 | LC | II            | 2  | 9   | 2   | -1   | 3   | 7   | 8    | -0.007 | 0.993 |
| Mammals | <i>Papio hamadryas</i>         | 1997 | 21 | LC | II            | 4  | 65  | 83  | 0    | 46  | 102 | 102  | 0.021  | 1.022 |

|         |                                  |      |    |    |               |    |     |     |      |     |     |     |        |       |
|---------|----------------------------------|------|----|----|---------------|----|-----|-----|------|-----|-----|-----|--------|-------|
| Mammals | <i>Parahyaena brunnea</i>        | 2001 | 17 | NT |               | 2  | 26  | 1   | -4   | 23  | 0   | 4   | -0.11  | 0.896 |
| Mammals | <i>Petaurus breviceps</i>        | 2009 | 9  | LC |               | 1  | 7   | 2   | 0    | 6   | 3   | 3   | -0.094 | 0.91  |
| Mammals | <i>Phascolarctos cinereus</i>    | 2006 | 12 | VU |               | 1  | 6   | 38  | 0    | 0   | 44  | 44  | 0.166  | 1.181 |
| Mammals | <i>Phoca hispida</i>             | 2013 | 5  | LC |               | 1  | 10  | 0   | -10  | 0   | 0   | 10  | 0      | 1     |
| Mammals | <i>Phoca largha</i>              | 2005 | 13 | LC |               | 3  | 86  | 2   | 0    | 7   | 81  | 81  | -0.005 | 0.995 |
| Mammals | <i>Phoca sibirica</i>            | 2013 | 5  | NT |               | 1  | 7   | 0   | 0    | 4   | 3   | 3   | -0.169 | 0.844 |
| Mammals | <i>Pongo pygmaeus</i>            | 1998 | 20 | CR | I             | 5  | 22  | 11  | -1   | 7   | 25  | 26  | 0.008  | 1.008 |
| Mammals | <i>Potos flavus</i>              | 2002 | 16 | LC | III(Honduras) | 1  | 4   | 5   | -6   | 3   | 0   | 6   | 0.025  | 1.026 |
| Mammals | <i>Procyon lotor</i>             | 2001 | 17 | LC |               | 1  | 20  | 0   | -18  | 2   | 0   | 18  | -0.006 | 0.994 |
| Mammals | <i>Puma concolor</i>             | 1997 | 21 | LC | II            | 4  | 26  | 4   | 0    | 23  | 7   | 7   | -0.062 | 0.939 |
| Mammals | <i>Pusa sibirica</i>             | 2007 | 11 | LC | II            | 3  | 9   | 0   | -4   | 0   | 5   | 9   | 0      | 1     |
| Mammals | <i>Rhinoceros unicornis</i>      | 2001 | 17 | VU | I             | 2  | 2   | 0   | 0    | 0   | 2   | 2   | 0      | 1     |
| Mammals | <i>Saguinus midas</i>            | 1999 | 19 | LC | II            | 3  | 96  | 27  | 0    | 86  | 37  | 37  | -0.05  | 0.951 |
| Mammals | <i>Saguinus oedipus</i>          | 2014 | 4  | CR | I             | 1  | 10  | 12  | 0    | 0   | 22  | 22  | 0.197  | 1.218 |
| Mammals | <i>Saiga tatarica</i>            | 1997 | 21 | CR | II            | 1  | 12  | 300 | 0    | 222 | 90  | 90  | 0.096  | 1.101 |
| Mammals | <i>Saimiri sciureus</i>          | 1997 | 21 | LC | II            | 11 | 613 | 438 | -401 | 250 | 400 | 801 | 0.013  | 1.013 |
| Mammals | <i>Sapajus apella</i>            | 1999 | 19 | LC | II            | 4  | 74  | 23  | -11  | 56  | 30  | 41  | -0.031 | 0.969 |
| Mammals | <i>Sigmoceros lichtensteinii</i> | 2000 | 18 | LC |               | 1  | 6   | 0   | 0    | 6   | 0   | 0   | NA     | 0     |
| Mammals | <i>Stenella attenuata</i>        | 2011 | 7  | LC | II            | 2  | 5   | 0   | -3   | 1   | 1   | 4   | -0.032 | 0.969 |
| Mammals | <i>Suricata suricatta</i>        | 2000 | 18 | LC |               | 7  | 136 | 140 | -50  | 101 | 125 | 175 | 0.014  | 1.014 |
| Mammals | <i>Symphalangus syndactylus</i>  | 2001 | 17 | EN | I             | 1  | 4   | 2   | 0    | 0   | 6   | 6   | 0.024  | 1.024 |
| Mammals | <i>Tamandua tetradactyla</i>     | 2013 | 5  | LC |               | 2  | 11  | 0   | 0    | 2   | 9   | 9   | -0.04  | 0.961 |
| Mammals | <i>Tapirus indicus</i>           | 2001 | 17 | EN | I             | 3  | 9   | 4   | 0    | 3   | 10  | 10  | 0.006  | 1.006 |
| Mammals | <i>Tapirus terrestris</i>        | 2000 | 18 | VU | II            | 3  | 8   | 1   | 0    | 2   | 7   | 7   | -0.007 | 0.993 |
| Mammals | <i>Taurotragus oryx</i>          | 1997 | 21 | LC |               | 6  | 62  | 173 | -35  | 67  | 133 | 168 | 0.047  | 1.049 |
| Mammals | <i>Tragelaphus scriptus</i>      | 1999 | 19 | LC |               | 2  | 26  | 84  | -8   | 48  | 54  | 62  | 0.046  | 1.047 |

|          |                                   |      |    |    |    |    |       |       |       |       |       |       |        |       |
|----------|-----------------------------------|------|----|----|----|----|-------|-------|-------|-------|-------|-------|--------|-------|
| Mammals  | <i>Tragelaphus strepsiceros</i>   | 1998 | 20 | LC |    | 4  | 87    | 89    | -6    | 111   | 59    | 65    | -0.015 | 0.986 |
| Mammals  | <i>Trichechus senegalensis</i>    | 2010 | 8  | VU | I  | 6  | 23    | 0     | -7    | 2     | 14    | 21    | -0.011 | 0.989 |
| Mammals  | <i>Tursiops aduncus</i>           | 2002 | 16 | NT | II | 2  | 27    | 7     | 0     | 6     | 28    | 28    | 0.002  | 1.002 |
| Mammals  | <i>Tursiops truncatus</i>         | 1997 | 21 | LC | II | 27 | 256   | 10    | -2    | 72    | 192   | 194   | -0.013 | 0.987 |
| Mammals  | <i>Ursus arctos</i>               | 2000 | 18 | LC | II | 1  | 2     | 2     | 0     | 0     | 4     | 4     | 0.039  | 1.039 |
| Mammals  | <i>Ursus maritimus</i>            | 1999 | 19 | VU | II | 10 | 23    | 2     | -1    | 7     | 17    | 18    | -0.013 | 0.987 |
| Mammals  | <i>Varecia rubra</i>              | 2013 | 5  | CR | I  | 1  | 4     | 1     | 0     | 0     | 5     | 5     | 0.045  | 1.046 |
| Mammals  | <i>Varecia variegata</i>          | 2013 | 5  | CR | I  | 5  | 39    | 19    | 0     | 7     | 51    | 51    | 0.054  | 1.055 |
| Mammals  | <i>Vicugna pacos</i>              | 1997 | 21 | NE |    | 8  | 83    | 183   | -5    | 53    | 208   | 213   | 0.045  | 1.046 |
| Mammals  | <i>Vulpes lagopus</i>             | 2013 | 5  | LC |    | 1  | 13    | 2     | 0     | 0     | 15    | 15    | 0.029  | 1.029 |
| Mammals  | <i>Vulpes zerda</i>               | 2005 | 13 | LC | II | 3  | 58    | 19    | 0     | 50    | 27    | 27    | -0.059 | 0.943 |
| Mammals  | <i>Zalophus californianus</i>     | 1997 | 21 | LC |    | 22 | 109   | 9     | 8     | 23    | 103   | 95    | -0.007 | 0.993 |
| Reptiles | <i>Alligator mississippiensis</i> | 1999 | 19 | LC | II | 1  | 400   | 376   | 0     | 424   | 352   | 352   | -0.007 | 0.993 |
| Reptiles | <i>Aspidites melanocephalus</i>   | 2013 | 5  | LC | II | 1  | 5     | 0     | 0     | 5     | 0     | 0     | NA     | 0     |
| Reptiles | <i>Boa constrictor</i>            | 2013 | 5  | NE | II | 1  | 7     | 0     | 31    | 0     | 38    | 7     | 0      | 1     |
| Reptiles | <i>Corallus enydris</i>           | 2013 | 5  | NE | II | 1  | 5     | 0     | 0     | 3     | 2     | 2     | -0.183 | 0.833 |
| Reptiles | <i>Crocodylus porosus</i>         | 1997 | 21 | LC | I  | 3  | 3980  | 7     | -2000 | 1958  | 29    | 2029  | -0.032 | 0.968 |
| Reptiles | <i>Crocodylus siamensis</i>       | 1997 | 21 | CR | I  | 5  | 43465 | 24119 | 0     | 37343 | 30241 | 30241 | -0.017 | 0.983 |
| Reptiles | <i>Epicrates cenchria</i>         | 2013 | 5  | NE | II | 1  | 10    | 0     | 0     | 0     | 10    | 10    | 0      | 1     |
| Reptiles | <i>Eunectes murinus</i>           | 2013 | 5  | NE | II | 1  | 15    | 0     | 0     | 8     | 7     | 7     | -0.152 | 0.859 |
| Reptiles | <i>Geochelone gigantea</i>        | 1998 | 20 | VU | II | 3  | 23    | 0     | 0     | 0     | 23    | 23    | 0      | 1     |
| Reptiles | <i>Geochelone sulcata</i>         | 2012 | 6  | VU | II | 2  | 130   | 2     | 0     | 1     | 131   | 131   | 0.001  | 1.001 |
| Reptiles | <i>Iguana iguana</i>              | 2001 | 17 | LC | II | 1  | 2     | 0     | 0     | 2     | 0     | 0     | NA     | 0     |
| Reptiles | <i>Morelia viridis</i>            | 2013 | 5  | LC | II | 1  | 5     | 0     | 0     | 2     | 3     | 3     | -0.102 | 0.903 |
| Reptiles | <i>Ptyas mucosus</i>              | 2001 | 17 | NE | II | 1  | 8     | 0     | 0     | 8     | 0     | 0     | NA     | 0     |

|          |                              |      |    |    |    |   |    |    |    |    |     |    |        |       |
|----------|------------------------------|------|----|----|----|---|----|----|----|----|-----|----|--------|-------|
| Reptiles | <i>Python bivittatus</i>     | 2001 | 17 | VU | II | 2 | 72 | 53 | 48 | 57 | 116 | 68 | -0.003 | 0.997 |
| Reptiles | <i>Python regius</i>         | 2001 | 17 | LC | II | 1 | 1  | 0  | 0  | 1  | 0   | 0  | NA     | 0     |
| Reptiles | <i>Stigmochelys pardalis</i> | 2000 | 18 | LC | II | 1 | 14 | 0  | 0  | 14 | 0   | 0  | NA     | 0     |
| Reptiles | <i>Tomistoma schlegelii</i>  | 2014 | 4  | VU | I  | 2 | 10 | 0  | 0  | 4  | 6   | 6  | -0.128 | 0.88  |
| Reptiles | <i>Varanus komodoensis</i>   | 2013 | 5  | VU | I  | 1 | 4  | 0  | 0  | 0  | 4   | 4  | 0      | 1     |
